## 1 Abstract

2 **Objectives:** To determine the prevalence of temporomandibular disorder and associated factors in an  
3 adolescent sample from Recife, Brazil. **Materials and Methods:** A cross-sectional study was conducted  
4 with 1342 adolescents aged 10-17 years. The Research Diagnostic Criteria for Temporomandibular  
5 Disorder (RDC/TMD) was used by calibrated examiners to evaluate the presence and levels of chronic  
6 pain. To evaluate the socioeconomic conditions, the Brazilian Economic Classification Criteria (CCEB)  
7 questionnaire was answered by the subjects. Data were analyzed by means of binary logistic regression in  
8 SPSS. **Results:** The results showed that 33.2% of the subjects had TMD irrespective of age ( $p=0.137$ ) or  
9 economic class ( $p=0.507$ ). Statistically significant associations were found between TMD and gender ( $p=$   
10  $0.020$ ), headache/migraine in the past six months ( $p=0,000$ ) and the presence of chronic pain ( $p=0,000$ ). In  
11 final model, logistic regression showed that chronic pain contributes to the presence of TMD. **Conclusions:**  
12 The prevalence of TMD was considered high (33.2%) and adolescents with chronic pain were more likely  
13 to have TMD. **Clinical Relevance:** The data contribute to the understanding of TMD among adolescents  
14 and to the development of preventive measures and policies to identify the dysfunction promptly.

15 **Keywords:** Temporomandibular joint dysfunction syndrome; Adolescent; Chronic Pain; Headache;

16

## 17 Introduction

18 The American Academy of Pediatric Dentistry (AAPD) has recognized that disorders of the  
19 temporomandibular joint (TMJ), masticatory muscles and associated structures occasionally occur in  
20 infants, children and adolescents. Temporomandibular disorder (TMD) is a collective term for a group of  
21 musculoskeletal and neuromuscular conditions that include several clinical signs and symptoms, such as  
22 pain, headache, TMJ sounds, TMJ locking and ear pain [1], involving the muscles of mastication, the TMJ  
23 and associated structures [2].

24 The prevalence of TMD in adolescents has been reported in recent studies showing a percentage  
25 of 9.0% to 48.7%, evaluated by the Research Diagnostic Criteria for Temporomandibular Disorders

26 (RDC/TMD), as may be seen in Table 01. The RDC/TMD serves as an evidence-based diagnostic and  
27 classification system to aid in the rational choice of clinical care for TMD patients around the world [19].  
28 It is based on a series of protocolized clinical procedures and on strict diagnostic criteria applied to the most  
29 common types of TMD [20].

30 **Table 1. Prevalence of TMD in adolescents by RDC/TMD.**

| <b>Authors</b>               | <b>Year</b> | <b>Country</b> | <b>Age (years)</b> | <b>N</b> | <b>Prevalence (%)</b> |
|------------------------------|-------------|----------------|--------------------|----------|-----------------------|
| Bertoli et al [3]            | 2018        | Brazil         | 10-14              | 934      | 34.9                  |
| Graue et al [4]              | 2016        | Norway         | 12-19              | 210      | 11.9                  |
| Al-Khotani et al [5]         | 2016        | Saudi Arabia   | 10-18              | 456      | 27.2                  |
| Aravena et al [6]            | 2016        | Chile          | 14-16              | 186      | 26.8                  |
| Franco-Micheloni et al [7]   | 2015        | Brazil         | 12-14              | 1094     | 30.4                  |
| Santis et al [8]             | 2014        | Brazil         | 6-18               | 110      | 20.0                  |
| Franco et al [9]             | 2014        | Brazil         | 12-14              | 1307     | 30.4                  |
| Pizolato et al [10]          | 2013        | Brazil         | 8-12               | 82       | 48.7                  |
| Drabovicz et al [11]         | 2012        | Brazil         | 18-19              | 200      | 35.5                  |
| Hirsch, Hoffmann & Türp [12] | 2012        | Germany        | 10-17              | 1011     | 10.2                  |
| Tecco et al [13]             | 2011        | Italy          | 12-15              | 390      | 28.2                  |
| Barbosa et al [14]           | 2011        | Brazil         | 8-14               | 547      | 39.1                  |
| Moyaho-Bernal et al [15]     | 2010        | Mexico         | 8-12               | 235      | 33.2                  |
| Pedras RBN [16]              | 2010        | Brazil         | 15-20              | 143      | 44.1                  |
| Wu & Hirsch [17]             | 2010        | German/China   | 13-18              | 1058     | 13.9                  |
| Pereira et al [18]           | 2010        | Brazil         | 12                 | 558      | 9.0                   |

31

32 The influence of socioeconomic factors on different health conditions is widely recognized.  
33 Individuals with higher incomes have greater access to information on health and preventive treatment,  
34 which can diminish the likelihood of disease progression [19]. Such individuals are also less exposed to  
35 risk factors such as precarious housing, nutrient-poor foods [21]. A research demonstrated that the  
36 poverty is an important condition to exhibit myofascial pain and joint problems [19] and a recent study  
37 [22] showed a significant association between symptoms of temporomandibular joint disorder (TMJD)

38 with poorer oral health-related quality of life (OHRQoL). The Brazilian Economic Classification Criteria  
39 (CCEB) was developed by the Brazilian Association of Research Companies [23] for population  
40 classification into groups according to economic class. This classification is based on the possession of  
41 goods and not based on family income, scores vary from zero (the poorest) to 46 (the richest).

42 The cumulative effect of muscle activities increases the likelihood of presenting painful TMD [24].  
43 Prolonged masticatory muscle pain is likely to become a chronic condition, and continuous pain may  
44 eventually produce chronic centrally mediated myalgia [25]. Through evaluation of adolescents diagnosed  
45 with moderate to severe TMD, a higher level of electromyographic activity was found in the masseter and  
46 temporal muscles at rest and during chewing [26]. Recent findings have suggested that prepubertal children  
47 with high levels of sedentary behavior, low levels of cardiorespiratory fitness and low body fat content may  
48 have increased likelihood of various pain conditions [27].

49 The orofacial pain among children and adolescents, which is also a TMD symptom, is an important  
50 public health problem [28] and it should be diagnosed as early as possible since the late diagnosis can lead  
51 to a state of more severe compromise resulting from these pathologies with relevant consequences [29].  
52 Therefore, assessment of the adolescent population, who are often exposed to possible risk factors, is  
53 important to establish the epidemiological pattern of TMD and work at prevention level to avoid the  
54 occurrence of the pathology in adulthood [29].

55 Appropriate care of adolescents with chronic pain requires a great deal of time, energy and  
56 affection from their parents [30]. However, due to the lack of proper education or information and  
57 prevention policies, these parents do not often understand the risks of future problems developing, with  
58 great loss of quality of life [31]. Therefore, this cross-sectional study was designed to evaluate the  
59 prevalence of TMD and associated factors in adolescents of 10-17 years according to RDC/TMD, with the  
60 purpose of contributing to the understanding of TMD among adolescents and to the future development of  
61 preventive measures based on scientific evidence.

## 62 **Subjects and methods**

63 The present observational, cross-sectional study was conducted in the city of Recife  
64 (Pernambuco/Brazil), in compliance with Resolution 466/12 of the Brazilian National Health

65 Council/Ministry of Health and approved by the Research Ethics Committee (Protocol number  
66 0397.0.172.000-11). The data were collected from of the city of Recife that is divided into two regional  
67 offices, north and south, owning 165 public schools. The study population consisted of adolescents of both  
68 genders enrolled in public schools in 2013; and conglomerate sampling was carried out covering the  
69 regions, in which 20 schools were randomly selected to participate in the study.

70 The inclusion criteria were schoolchildren between the ages of 10 and 19 years (criteria adopted  
71 by the World Health Organization (WHO) for adolescent people [32]), irrespective of gender or ethnicity,  
72 who were regularly enrolled and attending formal school activities at the selected schools that agreed to  
73 participate in the study; and adolescents who had their parents' or guardians' permission to participate in  
74 the research. The exclusion criteria were adolescents with neurological disorders; history of tumor in the  
75 head and neck; those who were undergoing continued use (or for less than three days) of anti-inflammatory,  
76 analgesics and corticosteroids, those unable to understand and/or respond to the RDC/TMD and/or CCEB  
77 (Research Instruments); history of rheumatic diseases; pain of odontogenic origin, and primary earache.

78 Adolescents who decided to participate and their guardians received and signed a term of free and  
79 informed consent before filling out the questionnaires. After completing the questionnaire, the adolescents  
80 were clinically examined by one of the four examiners who had been previously trained and calibrated for  
81 the diagnosis of TMD.

82 The presence of TMD and the level of chronic pain were assessed by means of the RDC/TMD,  
83 Axis I and II. For the diagnosis of TMD, the axis I was used, which presented the following diagnosis:  
84 myofascial pain with or without mouth opening limitation (Group 1-G1); disc displacement with and  
85 without reduction, and with or without mouth opening limitation (Group 2-G2); and arthralgia,  
86 osteoarthritis and osteoarthrosis (Group 3-G3). The prevalence of TMD was calculated by the number of  
87 subjects who had at least one positive diagnosis in one of the groups. The level of chronic pain was  
88 evaluated by means of Axis II.

89 The socioeconomic conditions were measured by the Brazilian Economic Classification Criteria  
90 (CCEB). ABEP scores vary from zero (the poorest) to 46 (the richest). The scores were transformed into  
91 social class categories. Scores from 0 to 7 correspond to class E, 8 to 13 (class D), 14 to 22 (class C), 23 to  
92 34 (class B), 35 to 46 (class A). In 2013, the Brazilian Association of Research Companies changed this

93 categorization. Thus, at present the classification is Class A1 and A2 (high socioeconomic level), B1 and  
94 B2 (medium-high socioeconomic level), C1 and C2 (medium-low socioeconomic level) and D-E Class (as  
95 a single class-poor socioeconomic level).

96 The clinical examination, according to the orientation of Axis I of the Research Diagnostic Criteria  
97 for Temporomandibular Disorders, was then performed under natural light and consisted of an extraoral  
98 and intraoral examination of the teeth and bite, palpation of the temporalis, masseter, digastric and medial  
99 pterygoid muscles, palpation of the temporomandibular joint and an analysis of jaw movement. The  
100 participant, seated in a chair, was instructed to close his/her mouth until maximum intercuspitation in  
101 centric occlusion. The participant was previously trained to perform this procedure and then instructed to  
102 maintain his/her usual bite with maximum clenching to determine the type of occlusion.

103 Headaches were assessed by means of question #18 of the RDC/TMD Axis II history questionnaire  
104 (“During the last six months have you had a problem with headaches or migraines?”) [33]. The degree of  
105 chronic TMD pain was also done by RDC/TMD Axis II through the chronic pain protocol evaluated, in  
106 which pain-related questions received points, and the sum of these points reported the degree of disability  
107 ranging from absence of chronic pain in the last six months (Grade 0) to severe limitation (Grade IV).

108 The Kolmogorov-Smirnov Z test was used to determine the data distribution (normal or non-  
109 normal). The data were first evaluated to obtain their percentages and distributions, and then the associated  
110 factors were identified, observing odds ratios (OR) and confidence intervals of 95% (95% CI). Continuous  
111 variables were analyzed with the Chi squared test.

112 A binary multivariate logistic regression model was constructed, in which only the variables that  
113 had a p-value  $\leq 0.20$  in the bivariate analysis were taken into account. The logistic regression model allowed  
114 statistical evaluation of the behavior of a variable, to verify whether the presence of a risk factor increased  
115 the probability of a given outcome by a specific percentage. In the analysis, the dependent variable was  
116 analyzed, dichotomized as follows: 0=no signs and/or symptom of TMD, 1=at least one clinical sign and/or  
117 symptom of TMD. The adjustment of the model was evaluated with the Hosmer-Lemeshow test that is  
118 frequently used in risk prediction models. In the multivariate analysis, the variables were introduced into  
119 the model as dummy variables. All statistical tests were carried out using the Statistical Package for Social  
120 Sciences (SPSS) version 23.0.

## 121 Results

122 The sample size was calculated based on the population of students enrolled in the Educational  
 123 State System in Recife in the target age range of search with a 95% confidence interval, a proportion of  
 124 0.331 (estimated prevalence of TMD), and the precision was fixed at 0.03. The intra- and inter-examiner  
 125 reliability levels varied from 0.92 to 0.96 analyzed by Cohen kappa statistics.

126 The sample consisted of 1342 individuals, of whom 68.7% were females; 60.7% belonged to  
 127 medium-low socioeconomic level (class C). The prevalence of TMD in the studied sample was 33.2% with  
 128 a peaked at the age of 12. In the last six months, 70.9% of the adolescents had headache/migraine with a  
 129 quarter of them associated with TMD (25.9%). Relative to chronic pain, this was shown in 27.9% of  
 130 subjects, and in 13.3% pain was associated with TMD (Table 2). We observed no statistically significant  
 131 associations between TMD and age ( $p=0.137$ ); and economic class ( $p=0.507$ ). Whereas gender showed  
 132 statistically significant association with TMD ( $p=0.020$ ) and so did headache in the past six months  
 133 ( $p=0.000$ ); chronic pain ( $p=0.000$ ); and degree of chronic pain ( $p=0.000$ ) (Table 2).

134

135 **Table 2. Distribution and bivariate analysis of participants regarding TMD according to gender, age, economic class, headache**  
 136 **in the past six months and presence and degree of chronic pain.**

| Variables |        | TMD           |               | Total         | OR (CI)                | p-value       |
|-----------|--------|---------------|---------------|---------------|------------------------|---------------|
|           |        | No (%)        | Yes (%)       | N (%)         |                        |               |
| Gender    | Male   | 299<br>(22.3) | 121<br>(9.0)  | 420<br>(31.3) |                        | 0.020*<br>(a) |
|           | Female | 597<br>(44.5) | 325<br>(24.2) | 922<br>(68.7) | 1.345<br>(1.047-1.729) |               |
| CCEB      | A + B  | 295<br>(23.6) | 136<br>(10.9) | 431<br>(34.5) |                        | 0.507<br>(a)  |
|           | C      | 496<br>(39.7) | 261<br>(22.9) | 757<br>(60.7) | 1.141<br>(0.887-1.469) |               |
|           | D+E    | 42            | 18            | 60            | 0.930                  |               |

|                                       |                     |               |               |               |                         |                   |
|---------------------------------------|---------------------|---------------|---------------|---------------|-------------------------|-------------------|
|                                       |                     | (3.4)         | (1.4)         | (4.8)         | (0.516-1.674)           |                   |
| <b>Age (years)</b>                    | 10-14               | 539<br>(40.2) | 287<br>(21.4) | 826<br>(61.5) |                         | 0.137<br><br>(a)  |
|                                       | 15-17               | 357<br>(26.6) | 159<br>(11.8) | 516<br>(38.5) | 0.836<br>(0.661-1.058)  |                   |
| <b>Headache in the past six month</b> | No                  | 292<br>(21.8) | 98<br>(7.3)   | 390<br>(29.1) |                         | 0.000*<br><br>(a) |
|                                       | Yes                 | 604<br>(45.0) | 348<br>(25.9) | 952<br>(70.9) | 1.717<br>(1.318-2.236)  |                   |
| <b>Chronic Pain</b>                   | No                  | 701<br>(52.2) | 267<br>(19.9) | 968<br>(72.1) |                         | 0.000*<br><br>(a) |
|                                       | Yes                 | 195<br>(14.5) | 179<br>(13.3) | 374<br>(27.9) | 2.410<br>(1.883-3.085)  |                   |
| <b>Degree of chronic pain</b>         | No pain             | 701<br>(52.2) | 267<br>(19.9) | 968<br>(72.1) | 5.251<br>(0.956-28.836) | 0.000*<br><br>(a) |
|                                       | Low intensity       | 75<br>(5.6)   | 49<br>(3.7)   | 124<br>(9.2)  | 3.061<br>(0.540-17.356) |                   |
|                                       | High intensity      | 107<br>(8.0)  | 99<br>(7.4)   | 206<br>(15.4) | 2.162<br>(0.387-12.062) |                   |
|                                       | Moderately limiting | 11<br>(0.8)   | 27<br>(2.0)   | 38<br>(2.8)   | 0.815<br>(0.130-5.112)  |                   |
|                                       | Severely limiting   | 2<br>(0.1)    | 4<br>(0.3)    | 6<br>(0.4)    | 1                       |                   |

137 (a) Chi-square test  
 138 \*statistically significant  
 139

140 Although the independent variable economic class presented a p-value above 0.2, it was also taken  
 141 into the logistic regression analysis to verify whether it was a confounding variable or whether it functioned  
 142 as an intervening variable. We found that this variable did not present any of these characteristics.

143 The multivariate logistic regression model is shown in Table 3. In this table it can be visualized that  
144 the presence of chronic pain is statistically related to the presence of TMD ( $p=0.049$ ). On the other hand,  
145 the absence of chronic pain (grade 0) is a protective factor for TMD ( $p=0.018$ ).

146 **Table 3. Multivariate analysis regardingly to grade of pain.**

|                                 | <b>B</b> | <b>S.E.</b> | <b>Wald</b> | <b>df</b> | <b>Sig.</b> | <b>Exp(B)</b> | <b>95.0% CI. for EXP(B)</b> |              |
|---------------------------------|----------|-------------|-------------|-----------|-------------|---------------|-----------------------------|--------------|
|                                 |          |             |             |           |             |               | <b>Lower</b>                | <b>Upper</b> |
| <b>Chronic Pain</b>             | -1.718   | 0.872       | 3.884       | 1         | 0.049       | 0.179         | 0.032                       | 0.991        |
| <b>Chronic Pain<br/>Grade 0</b> |          |             | 10.125      | 3         | 0.018       |               |                             |              |
| <b>Chronic Pain<br/>Grade 2</b> | -1.170   | 0.890       | 1.728       | 1         | 0.189       | 0.310         | 0.054                       | 1.777        |
| <b>Chronic Pain<br/>Grade 3</b> | -0.792   | 0.881       | 0.810       | 1         | 0.368       | 0.453         | 0.081                       | 2.544        |
| <b>Chronic Pain<br/>Grade 4</b> | 0.065    | 0.943       | 0.005       | 1         | 0.945       | 1.067         | 0.168                       | 6.771        |
| <b>Constant</b>                 | 0.497    | 0.921       | 0.291       | 1         | 0.589       | 1.644         |                             |              |

147

## 148 **Discussion**

149 This is a population-based epidemiological study that presents the prevalence of TMD-diagnoses  
150 according to the RDC/TMD classification among adolescents aged 10 to 17 years. Epidemiological studies  
151 are useful for the management of healthcare services by allowing the profile of a given population to be  
152 determined and helping to establish public policies with the aim of controlling and eradicating adverse  
153 health conditions [19]. The different prevalence rates described for TMD in the literature may be explained  
154 by the use of different diagnostic tools for TMD, absence of clinical examinations and self-reported TMD-  
155 pain, signs and symptoms [5, 24]. The RDC/TMD are the most important diagnostic tools, properly  
156 translated into Portuguese [34] and other languages, showing good reliability in children and adolescents  
157 [35], in addition to being adapted, validated, and extensively used since 1992 [33]. Although there is a new  
158 version of the RDC, DC/TMD, this new version has not yet been validated for Brazil and for this reason  
159 does not allow an adequate comparison with published articles.



160

161           The prevalence of TMD in the present study (33.2%) was determined based on any TMD subtype  
162 in Axis I of the RDC/TMD in a sample composed of adolescents aged 10 to 17 years; it was a little higher  
163 than values shown in previous literature reports [5, 7, 13] and similar to those shown by others [15]. This  
164 can be also attributed to at least two more factors. First, the age range studied in the present study, not only  
165 one age group, which also made it difficult to compare their outcomes with those of other studies. Moreover,  
166 the adolescents in the present study were diagnosed with TMD irrespective of the type. These results  
167 showed that TMD evaluation should be a recommended part of the routine examination. Many adults with  
168 TMD pain have reported that their condition began during adolescence [36]. Individuals who developed  
169 TMD pain in adolescence may have had an underlying vulnerability to experiencing pain that was not  
170 restricted to the orofacial region [37].

171           The presence of reproductive hormones seemed to increase the risk of developing pain during the  
172 time when girls go through puberty [38]. However, no evidence has been found up to the present time  
173 indicating how sex hormones could affect sensory processing in the trigeminal system, especially during  
174 adolescence [7, 39] or in association with the menarche [9]. In our study, we found statistically significant  
175 association between gender and TMD, which disagreed with findings described in previous studies [5-7,  
176 10, 15, 24, 40], but there are other studies that have shown significant association between female gender  
177 and TMD, with females being the most affected [4, 12-14, 37, 41, 42]. On the other hand, our results must  
178 be analyzed with caution, since there was an unequal proportion between girls and boys evaluated; twice  
179 as many girls volunteered to participate in the study.

180           Although the relation between TMD and age was not statistically significant, the prevalence  
181 increased from childhood up to young adulthood. In our study, the prevalence of TMD was found to be  
182 higher in early adolescence (21.4%) than in the late (11.8%). However, within the period of adolescence  
183 there was also a tendency for TMD to increase [13, 43]. Others studies [4, 44] reported that TMD started  
184 to increase at the age of 12 and peaked at the age of 16. In our findings, TMD had two peaks: at the age of  
185 12 and 16, the first pick can be explained due to the presence of reproductive hormones increasing the risk  
186 of pain development during the puberty time in girls [38] and the second pick matches with the age of first  
187 professional choices and responsibilities.

188           Several health problems may be associated with economic class; at present there is no evidence  
189 supporting a relationship between economic class and TMD. The majority of adolescents in our study were  
190 classified as Class C (60.7%) and for this reason, showed no statistical association between the variables  
191 ( $p=0.507$ ). However, in the literature there were results in agreement with our study [7] and others in  
192 disagreement [14, 22], probably because of the difference in the diagnostic criteria and age groups.

193           Headaches are the most prevalent neurological disorders and one of the most common symptoms  
194 reported in general practice. The percentage of the adult population with an active headache disorder is  
195 46% for headache in general, in children/adolescents rates of up to 69.5% have been reported [40]. In the  
196 WHO's ranking of causes of disability, this would bring headache disorders into the 10 most disabling  
197 conditions for the two genders; and the five most disabling for women. Headache is commonly associated  
198 with TMD among children and adolescents [9, 40, 45, 46]. Its presence in adolescents may result in low  
199 achievement in school, difficulty in social relationships; moreover, difficulty with eating can cause even  
200 more pain, and influence their biological functions, loss of quality of life, suffering and disability. It has  
201 also been speculated that a combination of developmental and hormonal changes would be responsible for  
202 increasing headache in girls after menarche [47], but this could also not be confirmed [9].

203           The headache makes pain parameters more intense and frequent, complicating dysfunctional  
204 diseases both in the diagnostic and treatment phases [48]. In our findings, 70.9% of the adolescents had  
205 headache/migraine, and in a quarter of them it was associated with TMD (25.9%) in the past six months  
206 ( $p=0.000$ ). There were significant statistical association between headache in the past six months and TMD,  
207 and this was in agreement with previous studies [5, 7, 9, 15, 40]. Signs and symptoms of TMD occurred  
208 more often in adolescents with headache in comparison with those who were headache-free [49]. This could  
209 be explained by the fact that headache determines an increased central sensitization to pain and an  
210 exacerbation of pain symptoms in the craniocervical-mandibular joint [50].

211           There are two important aspects of chronic pain in children and adolescents: the delay in referring  
212 these patients to a pediatric pain specialist, and the failure to recognize psychological disorders as an  
213 important comorbid condition in chronic pain [51]. Often, lack of an identifiable etiology along with the  
214 complex biopsychosocial nature of this condition leads to a lengthy diagnostic odyssey and delayed  
215 treatment that exacerbates the existing problem [52].

216 This populational based Brazilian epidemiological study assessed the degree of chronic TMD pain  
217 by means of the RDC/TMD Axis II among adolescents aged 10 to 17 years. Our findings showed that in  
218 13.3% of adolescents there were significant associations between presence of chronic pain and TMD,  
219 among whom 7.4% had pain with high intensity and 3.2% had some mouth opening limitation ( $p=0.000$ ).  
220 Previous findings have shown association between presence of chronic pain and TMD, in agreement with  
221 our findings [5, 7]. Logistic regression showed that the presence of chronic pain contributes to the final  
222 diagnosis of TMD. The fact that most adolescents did not have chronic pain (72.1%) could be because the  
223 orofacial muscles of young individuals have higher physiological adaptive ability during growth and  
224 development.

225 Some studies have suggested that individuals who reported pain and other common symptoms in  
226 childhood are at an increased risk for having pain in adulthood [53-56]. Patients with childhood chronic  
227 pain had 3 times more chance to have fibromyalgia, according to the American College of Rheumatology  
228 (ACR) survey criteria, in contrast with those who denied chronic pain in their youth. Also consistent with  
229 fibromyalgia, or more broadly, the centralized pain phenotype, patients reporting childhood chronic pain  
230 had higher levels of anxiety symptoms and slightly worse functional status [57, 58].

231 The strengths of our study included: a large and representative adolescent student population; the  
232 methodology for assessing by RDC/TMD, Axis I and II; the sample size and sampling process were  
233 representative of the age group, with results demonstrating a high prevalence. On the other hand, our sample  
234 was comprised only of children and adolescents enrolled in the public education system, for this reason,  
235 although the sample size and the sampling process was considered very adequate, we could not extrapolate  
236 our results to the entire population of children and adolescents in the municipality.

237

## 238 **Conclusions**

- 239 • The prevalence of TMD among adolescents was high irrespective of age or economic class;
- 240 • The gender, headache/migraine, presence of chronic pain had a statistically significant association  
241 with TMD;

242

243 **ACKNOWLEDGMENTS**

244 The authors would like to thank the Coordination for the Training of Higher Education Personnel  
245 (CAPES) for the research grant we received during the development of this study,

246

247 **REFERENCES**

- 248 1. Okeson JPO. Bell's Oral and Facial Pain. 7th ed. Chicago: Quintessence Pub Co Inc; 2014.  
249 2. American Academy of Pediatric Dentistry. Clinical guideline on acquired temporomandibular  
250 disorders in infants, children and adolescents. *Pediatric Dentistry*. 2015; 37: 272-278. Available  
251 from: <http://www.webcitation.org/71yBvP8mF>.  
252 3. Bertoli FMdP, Bruzamin CD, Pizzatto E, Losso EM, Brancher JA, Souza JF. Prevalence of  
253 diagnosed temporomandibular disorders: a cross-sectional study in Brazilian adolescents. *Plos*  
254 *One*. 2018; 13: e0192254. doi: 10.1371/journal.pone.0192254. PMID: 29420573.  
255 4. Graue AM, Jokstad A, Assmus J, Skeie MS. Prevalence among adolescents in Bergen, Western  
256 Norway, of temporomandibular disorders according to the DC/TMD criteria and examination  
257 protocol. *Acta Odontol Scand*. 2016; 74: 449-455. doi: 10.1080/00016357.2016.1191086. PMID:  
258 27251463.  
259 5. Al-Khotani A, Naimi-Akbar A, Albadawi E, Ernberg M, Hedenberg-Magnusson B, Christidis N.  
260 Prevalence of diagnosed temporomandibular disorders among Saudi Arabian children and  
261 adolescents. *J Headache Pain*. 2016; 17: 41. doi: 10.1186/s10194-016-0642-9. PMID: 27102118.  
262 6. Aravena PC, Arias R, Aravena-Torres R, Seguel-Galdames F. Prevalence of temporomandibular  
263 disorders in adolescents of Southern Chile in 2015. *Rev Clin Periodoncia Implantol Rehabil Oral*.  
264 2015; 9: 244-252. doi: 10.1016/j.piro.2016.09.005.  
265 7. Franco-Micheloni AL, Fernandes G, de Godoi Gonçalves DA, Camparis CM.  
266 Temporomandibular disorders in a young adolescent brazilian population: epidemiologic  
267 characterization and associated factors. *J Oral Facial Pain Headache*. 2015; 29: 242-249. doi:  
268 10.11607/ofph.1262. PMID: 26244432.  
269 8. Santis TO, Motta LJ, Biasotto-Gonzalez DA, Mesquita-Ferrari RA, Fernandes KP, Godoy CH, et  
270 al. Accuracy study of the main screening tools for temporomandibular disorder in children and  
271 adolescents. *J Bodyw Mov Ther*. 2014; 18:87-91. doi: 10.1016/j.jbmt.2013.05.018. PMID:  
272 24411155.  
273 9. Franco AL, Fernandes G, Gonçalves DA, Bonafé FS, Camparis CM. Headache associated with  
274 temporomandibular disorders among young brazilian adolescents. *Clin J Pain*. 2014; 30: 340-5.  
275 doi: 10.1097/AJP.0b013e31829ca62f. PMID: 23792345.  
276 10. Pizolato RA, Freitas-Fernandes FS, Gavião MBD. Anxiety/depression and orofacial myofacial  
277 disorders as factors associated with TMD in children. *Braz Oral Res*. 2013; 27: 156-162. PMID:  
278 23538427.  
279 11. Drabovicz PVSM, Salles V, Drabovicz PEM, Fontes MJF. Assessment of sleep quality in  
280 adolescents with temporomandibular disorders. *J Pediatr*. 2012; 88: 169-72. doi:  
281 10.2223/jped.2180. PMID: 22415039.  
282 12. Hirsch C, Hoffmann J, Turp JC. Are temporomandibular disorder symptoms and diagnoses  
283 associated with with pubertal development in adolescents? An epidemiological study. *J Orofac*  
284 *Orthop*. 2012; 73: 6-18. doi: 10.1007/s00056-011-0056-x. PMID: 22234412.  
285 13. Tecco S, Crincoli V, Di Bisceglie B, Saccucci M, Macrí M, Polimeni A et al. Signs and symptoms  
286 of temporomandibular joint disorders in Caucasian children and adolescents. *Cranio*. 2011; 29:  
287 71-79. doi: 10.1179/cm.2011.010. PMID: 21370771.  
288 14. Barbosa TS, Leme MS, Castelo PM, Gavião MBD. Evaluating oral health-related quality of life  
289 measure for children and preadolescents with temporomandibular disorder. *Health Qual Life*  
290 *Outcomes*. 2011; 9: 32. doi: 10.1186/1477-7525-9-32. PMID: 21569403.  
291 15. Moyaho-Bernal A, Lara-Muñoz Mdel C, Espinosa-De Santillana I, Etchegoyen G. Prevalence of  
292 signs and symptoms of temporomandibular disorders in children in the State of Puebla, Mexico,  
293

- 294 evaluated with the research diagnostic criteria for temporomandibular disorders (RDC/TMD).  
295 Acta Odontol Latinoam. 2010; 23: 228-33. PMID: 21638964.
- 296 16. Pedras RBN. Prevalence of temporomandibular dysfunction in adolescents from the south-central  
297 region of the city of Belo Horizonte: an epidemiological study. M. Sc. Dissertation, Federal  
298 University of Minas Gerais. 2010. Available from: <http://hdl.handle.net/1843/BUOS-9FEFP9>.
- 299 17. Wu H, Hirsch C. Temporomandibular disorders in German and Chinese adolescents. J Orofac  
300 Orthop. 2010; 71: 187-98. doi: 10.1007/s00056-010-1004-x. PMID: 20503001.
- 301 18. Pereira LJ, Pereira-Cenci T, Del Bel Cury AA, Pereira SM, Pereira AC, Ambosano GM, et al.  
302 Risk indicators of temporomandibular disorder incidences in early adolescence. Pediatr Dent.  
303 2010; 32: 324-8. PMID: 20836952.
- 304 19. Magalhães BG, de Sousa ST, de Mello VV, da Silva-Barbosa AC, de Assis-Morais MP, Barbosa-  
305 Vasconcelos MM, et al. Risk factors for temporomandibular disorder: binary logistic regression  
306 analysis. Med Oral Patol Oral Cir Bucal. 2014; 19: e232-6. doi: 10.4317/medoral.19434. PMID:  
307 24316706.
- 308 20. List T, Greene CS. Moving forward with the RDC/TMD. J Oral Rehabil. 2010; 37: 731-3. doi:  
309 10.1111/j.1365-2842.2010.02135.x. PMID: 20887276.
- 310 21. Martins RJ, Garcia AR, Garbin CA, Sundefeld ML. The relation between socio-economic class  
311 and demographic factors in the occurrence of temporomandibular joint dysfunction. Cien Saude  
312 Colet. 2008; 13: 2089-2096. PMID: 19039392.
- 313 22. Inglehart MR, Patel MH, Widmalm SE, Briskie DM. Self-reported temporomandibular joint  
314 disorder symptoms, oral health and quality of life of children in kindergarten through grade 5: do  
315 sex, race, and socioeconomic background matter? J Dent Am Assoc. 2016; 147: 131-141. doi:  
316 10.1016/j.adaj.2015.10.001. PMID: 26809694.
- 317 23. ABEP. Changes in the application of the Brazil Criteria, valid from 01/01/2013. 2013. P. 1-5.
- 318 24. Fernandes G, van Selms MK, Gonçalves DA, Lobbezoo F, Camparis CM. Factors associated with  
319 temporomandibular disorders pain in adolescents. J Oral Rehabil. 2015; 42: 113-19. doi:  
320 10.1111/joor.12238. PMID: 25244610.
- 321 25. De Leew R, Klasser GD. Orofacial Pain: Guidelines for assessment, diagnosis and management.  
322 5th ed. Chicago: Quintessence Publishing Co, Inc; 2013.
- 323 26. Lauriti L, Motta LJ, de Godoy CH, Biasotto-Gonzalez DA, Politti F, Mesquita-Ferrari RA, et al.  
324 Influence of temporomandibular disorder on temporal and masseter muscles and occlusal contacts  
325 in adolescents an electromyographic study. BMC Musculoskelet Disord. 2014; 15: 123. doi:  
326 10.1186/1471-2474-15-123. PMID: 24721559.
- 327 27. Vierola A, Suominen AL, Lindi V, Viitasalo A, Ikävalko T, Lintu N, et al. Associations of  
328 sedentary behavior, physical activity, cardiorespiratory fitness and body fat content with pain  
329 conditions in children: the physical activity and nutrition in children study. Am Pain Soc. 2016;  
330 17: 845-853. doi: 10.1016/j.pain.2016.03.011. PMID: 27126997.
- 331 28. Carrara SV, Conti PCR, Barbosa JS. Term of the 1st congress in temporomandibular dysfunction  
332 and orofacial pain. Dental Press J Orthod. 2010; 15: 114-20. doi: 10.1590/s2176-  
333 94512010000300014.
- 334 29. Oliveira CB, Lima JAS, Silva PLP, Forte FDS, Bonan PRF, Batista AUD. Temporomandibular  
335 disorders and oral habits in high-school adolescents: a public health issue? RGO. 2016; 64: 08-16.  
336 doi: 10.1590/1981-863720160001000013054.
- 337 30. Clinch J. Recognizing and managing chronic musculoskeletal pain in childhood. Paediatr Child  
338 Health. 2009; 19: 381-387. doi: 10.1016/j.paed.2009.04.007.
- 339 31. Gui MS, Pimentel MJ, Gama MCS, Ambrosano GMB, Barbosa CMR. Quality of life in  
340 temporomandibular disorder patients with localized and widespread pain. Braz J Oral Sci. 2014;  
341 13: 193-97. doi: 10.1590/1677-3225v13n3a06.
- 342 32. WHO | Adolescent health. WHO: World Health Organization, 2016.
- 343 33. Dworkin SF, LeResche L. Research diagnostic criteria for temporomandibular disorders: review,  
344 criteria, examinations and specifications, critique. J Craniomandib Disord. 1992; 6: 301:55. PMID:  
345 1298767.
- 346 34. Pereira Júnior FJ, Favilla EE, Dworkin S, Huggins K. Research diagnostic criteria for  
347 temporomandibular disorders (RDC/TMD): formal translation to portuguese. JBC J Bras Clin  
348 Odontol Integr. 2004; 8: 384-95.
- 349 35. Wahlund K, List T, Dworkin SF. Temporomandibular disorders in children and adolescents:  
350 reliability of a questionnaire, clinical examination and diagnosis. J Orofac Pain. 1998; 12:42-51.  
351 PMID: 9656898.
- 352 36. Von Korff M, Dworkin SF, LeResche L, Kruger A. An epidemiologic comparison of pain  
353 complaints. Pain. 1988; 32: 173-183. PMID: 3362555.

- 354 37. LeResche L, Mancl LA, Drangsholt MT, Huang G, Von Korff M. Predictors of onset of facial  
355 pain and temporomandibular disorders in early adolescence. *Pain*. 2007; 129: 269-278. doi:  
356 10.1016/j.pain.2006.10.012. PMID: 17134830.
- 357 38. LeResche L, Mancl LA, Drangsholt MT, Saunders K, Von Korff M. Relationship of pain and  
358 symptoms to pubertal development in adolescents. *Pain*. 2005; 118: 201-9. doi:  
359 10.1016/j.pain.2005.08.011. PMID: 16213087.
- 360 39. Cairns BE. The influence of gender and sex steroids on craniofacial nociception. *Headache*. 2007;  
361 47: 319-24. PMID: 17300382.
- 362 40. Nilsson IM, List T, Drangsholt M. Headache and co-morbid pains associated with TMD pain in  
363 adolescents. *J Dent Res*. 2013; 92: 802-807. doi: 10.1177/0022034513496255. PMID: 23813050.
- 364 41. Hirsch C, John MT, Lautenschläger C, List T. Mandibular jaw movement capacity in 10-17-yr-  
365 old children and adolescents: normative values and the influence of gender, age, and  
366 temporomandibular disorders. *Eur J Oral Sci*. 2006; 37: 381-90. doi: 10.1111/j.1600-  
367 0722.2006.00402.x. PMID: 17184226.
- 368 42. Wahlund K. Temporomandibular disorders in adolescents. Epidemiological and methodological  
369 studies and a randomized controlled trial [thesis]. *Swed Dent J*. 2003; Supp. 164: 2-64. PMID:  
370 14717039.
- 371 43. Magnusson T, Egermarki I, Carlsson GE. A prospective investigation over two decades on signs  
372 and symptoms of temporomandibular disorders and associated variables. A final summary. *Acta*  
373 *Odontol Scand*. 2005; 63: 99-109. PMID: 16134549.
- 374 44. Nilsson IM, List T, Drangsholt M. Incidence and temporal patterns of temporomandibular disorder  
375 pain among Swedish adolescents. *J Orofac Pain*. 2007; 21: 127-132. PMID: 17547124.
- 376 45. Egermark I, Carlsson GE, Magnusson T. A 20-year longitudinal study of subjective symptoms of  
377 temporomandibular disorders from childhood to adulthood. *Acta Odontol Scand*. 2001; 59: 40-8.  
378 PMID: 11318044.
- 379 46. Al Jumah M, Awada A, Al Azzam S. Headache syndromes amongst schoolchildren in Riyadh,  
380 Saudi Arabia. *Headache*. 2002; 42: 281-6. PMID: 12010385.
- 381 47. Hershey AD. Perimenstrual headache in adolescence. *Curr Pain Headache Rep*. 2012; 16:  
382 474-476. doi: 10.1007/s11916-012-0288-5. PMID: 22814796.
- 383 48. Di Paolo C, D'Urso A, Papi P, Di Sabato F, Rosella D, Pompa G, et al. Temporomandibular  
384 disorders and headache: a retrospective analysis of 1198 patients. *Pain Res Manag*. 2017; 2017: 8  
385 pages. doi: 10.1155/2017/3203027. PMID: 3203027.
- 386 49. Bertoli FM, Antoniuk SA, Bruck I, Xavier GR, Rodrigues DC, Losso EM. Evaluation of the signs  
387 and symptoms of temporomandibular disorders in children with headaches. *Arch neuropsychiatr*.  
388 2007; 65: 251-255. PMID: 17607423.
- 389 50. Latremoliere A, Woolf CJ. Central sensitization: a generator of pain hypersensitivity by central  
390 neural plasticity. *Journal of Pain*. 2009; 10: 895-926. doi: 10.1016/j.jpain.2009.06.012. PMID:  
391 19712899.
- 392 51. Cucchiaro G, Schwartz J, Hutchason A, Ornelas B. Chronic pain in children: a look at the referral  
393 process to a pediatric pain clinic. *International Journal of Pediatrics*. 2017; doi:  
394 10.1155/2017/8769402.
- 395 52. Yazdani S, Zeltzer L. Treatment of chronic pain in children and adolescents. *Pain Manag*. 2013;  
396 3: 303-314. doi: 10.2217/pmt.13.25. PMID: 24654816.
- 397 53. Hassett AL, Hilliard PE, Goesling J, Clauw DJ, Harte SE, Brummett CM. Reports of chronic pain  
398 in childhood and adolescence among patients at a tertiary care pain clinic. *The Journal of Pain*.  
399 2013; 14: 1390-1397. doi: 10.1016/j.jpain.2013.06.010. PMID: 24021576.
- 400 54. Jones GT, Silman AJ, Power C, Macfarlane GJ. Are common symptoms in childhood associated  
401 with chronic widespread body pain in adulthood? Results from the 1958 British Birth Cohort  
402 Study. *Arthritis Rheum*. 2007; 56: 1669-1675. doi: 10.1002/art.22587.
- 403 55. Brattberg G. Do pain problems in Young school children persist into early adulthood? A 13-year  
404 follow up. *Eur J Pain*. 2004; 8: 187-199. PMID: 15109969.
- 405 56. Waldie KE, Poulton R. Physical and psychological correlates of primary headache in young  
406 adulthood: a 26 year longitudinal study. *J Neurol Neurosurg Psychiatry*. 2002; 72: 86-92. doi:  
407 10.1136/jnnp.721.86.
- 408 57. Arnold LM, Hudson JI, Keck PE, Auchenbach MB, Javaras KN, Hess EV. Comorbidity of  
409 fibromyalgia and psychiatric disorders. *J Clin Psychiatric*. 2006; 67: 1219-1225. PMID:  
410 16965199.
- 411 58. Hassett AL, Radvanski DC, Buyske S, Savage SV, Sigal LH (2009) Psychiatric comorbidity and  
412 other psychological factors in patients with "chronic Lyme disease". *Am J Med*. 2009; 122:843-  
413 850. doi: 10.1016/j.amjmed.2009.02.022. PMID: 19699380.

414

415

416

417

## Supporting information

418

**S1 File. Data set from the study**

419

**S1 Table. Prevalence of TMD in adolescents by RDC/TMD, distribution of participants and bivariate and multivariate analysis.**

420

421

422

## Author Contributions

423

**Conceptualization:** Simone Guimarães Farias Gomes, Rosana Ximenes, Aronita Rosenblatt, Arnaldo de França Caldas Júnior.

424

425

**Data curation:** Rosana Ximenes, Aronita Rosenblatt, Arnaldo de França Caldas Júnior.

426

**Formal analysis:** Paulo Correia de Melo Júnior; Manuela Arnaud, Maria Goretti de Souza Lima, João Márcilio Coelho Netto Lins Aroucha, Simone Guimarães Farias Gomes, Rosana Ximenes, Aronita Rosenblatt, Arnaldo de França Caldas Júnior.

427

428

429

**Funding acquisition:** Aronita Rosenblatt, Arnaldo de França Caldas Júnior.

430

**Investigation:** Paulo Correia Melo Júnior, Manuela Arnaud, João Márcilio Coelho Netto Lins Aroucha, Aronita Rosenblatt, Arnaldo de França Caldas Júnior.

431

432

**Methodology:** Paulo Correia de Melo Júnior; Manuela Arnaud, Maria Goretti de Souza Lima, João Márcilio Coelho Netto Lins Aroucha, Simone Guimarães Farias Gomes, Rosana Ximenes, Aronita Rosenblatt, Arnaldo de França Caldas Júnior.

433

434

435

**Project administration:** Rosana Ximenes, Aronita Rosenblatt, Arnaldo de França Caldas Júnior.

436

**Resources:** Aronita Rosenblatt, Arnaldo de França Caldas Júnior.

437

**Supervision:** Simone Guimarães Farias Gomes, Rosana Ximenes, Aronita Rosenblatt, Arnaldo de França Caldas Júnior.

438

439

**Validation:** Paulo Correia de Melo Júnior, Manuela Arnaud, Maria Goretti de Souza Lima, João Márcilio Coelho Netto Lins Aroucha, Aronita Rosenblatt, Arnaldo de França Caldas Júnior.

440

441

**Visualization:** Arnaldo de França Caldas Júnior.

442            **Writing – original draft:** Paulo Correia de Melo Júnior; Manuela Arnaud, Maria Goretti de Souza  
443            Lima, João Márcílio Coelho Netto Lins Aroucha, Simone Guimarães Farias Gomes.  
444            **Writing – review & editing:** Paulo Correia de Melo Júnior; Manuela Arnaud, Maria Goretti de  
445            Souza Lima, João Márcílio Coelho Netto Lins Aroucha, Simone Guimarães Farias Gomes, Rosana  
446            Ximenes, Aronita Rosenblatt, Arnaldo de França Caldas Júnior.



**Table 1. Prevalence of TMD in adolescents by RDC/TMD.**

| Authors                      | Year | Country      | Age (years) | N    | Prevalence (%) |
|------------------------------|------|--------------|-------------|------|----------------|
| Bertoli et al [3]            | 2018 | Brazil       | 10-14       | 934  | 34.9           |
| Graue et al [4]              | 2016 | Norway       | 12-19       | 210  | 11.9           |
| Al-Khotani et al [5]         | 2016 | Saudi Arabia | 10-18       | 456  | 27.2           |
| Aravena et al [6]            | 2016 | Chile        | 14-16       | 186  | 26.8           |
| Franco-Micheloni et al [7]   | 2015 | Brazil       | 12-14       | 1094 | 30.4           |
| Santis et al [8]             | 2014 | Brazil       | 6-18        | 110  | 20.0           |
| Franco et al [9]             | 2014 | Brazil       | 12-14       | 1307 | 30.4           |
| Pizolato et al [10]          | 2013 | Brazil       | 8-12        | 82   | 48.7           |
| Drabovicz et al [11]         | 2012 | Brazil       | 18-19       | 200  | 35.5           |
| Hirsch, Hoffmann & Türp [12] | 2012 | Germany      | 10-17       | 1011 | 10.2           |
| Tecco et al [13]             | 2011 | Italy        | 12-15       | 390  | 28.2           |
| Barbosa et al [14]           | 2011 | Brazil       | 8-14        | 547  | 39.1           |
| Moyaho-Bernal et al [15]     | 2010 | Mexico       | 8-12        | 235  | 33.2           |
| Pedras RBN [16]              | 2010 | Brazil       | 15-20       | 143  | 44.1           |
| Wu & Hirsch [17]             | 2010 | German/China | 13-18       | 1058 | 13.9           |
| Pereira et al [18]           | 2010 | Brazil       | 12          | 558  | 9.0            |

**Table 2. Distribution and bivariate analysis of participants regarding TMD according to gender, age, economic class, headache in the past six months and presence and degree of chronic pain.**

| Variables     |        | TMD           |               | Total         | OR (CI)                | p-value       |
|---------------|--------|---------------|---------------|---------------|------------------------|---------------|
|               |        | No (%)        | Yes (%)       | N (%)         |                        |               |
| <b>Gender</b> | Male   | 299<br>(22.3) | 121<br>(9.0)  | 420<br>(31.3) | 1.345<br>(1.047-1.729) | 0.020*<br>(a) |
|               | Female | 597<br>(44.5) | 325<br>(24.2) | 922<br>(68.7) |                        |               |
| <b>CCEB</b>   | A + B  | 295<br>(23.6) | 136<br>(10.9) | 431<br>(34.5) |                        | 0.507<br>(a)  |

|                                               |                        |               |               |               |                         |               |
|-----------------------------------------------|------------------------|---------------|---------------|---------------|-------------------------|---------------|
|                                               | C                      | 496<br>(39.7) | 261<br>(22.9) | 757<br>(60.7) | 1.141<br>(0.887-1.469)  |               |
|                                               | D+E                    | 42<br>(3.4)   | 18<br>(1.4)   | 60<br>(4.8)   | 0.930<br>(0.516-1.674)  |               |
| <b>Age<br/>(years)</b>                        | 10-14                  | 539<br>(40.2) | 287<br>(21.4) | 826<br>(61.5) |                         | 0.137<br>(a)  |
|                                               | 15-17                  | 357<br>(26.6) | 159<br>(11.8) | 516<br>(38.5) | 0.836<br>(0.661-1.058)  |               |
| <b>Headache<br/>in the past<br/>six month</b> | No                     | 292<br>(21.8) | 98<br>(7.3)   | 390<br>(29.1) |                         | 0.000*<br>(a) |
|                                               | Yes                    | 604<br>(45.0) | 348<br>(25.9) | 952<br>(70.9) | 1.717<br>(1.318-2.236)  |               |
| <b>Chronic<br/>Pain</b>                       | No                     | 701<br>(52.2) | 267<br>(19.9) | 968<br>(72.1) |                         | 0.000*<br>(a) |
|                                               | Yes                    | 195<br>(14.5) | 179<br>(13.3) | 374<br>(27.9) | 2.410<br>(1.883-3.085)  |               |
| <b>Degree of<br/>chronic<br/>pain</b>         | No pain                | 701<br>(52.2) | 267<br>(19.9) | 968<br>(72.1) | 5.251<br>(0.956-28.836) | 0.000*<br>(a) |
|                                               | Low intensity          | 75<br>(5.6)   | 49<br>(3.7)   | 124<br>(9.2)  | 3.061<br>(0.540-17.356) |               |
|                                               | High intensity         | 107<br>(8.0)  | 99<br>(7.4)   | 206<br>(15.4) | 2.162<br>(0.387-12.062) |               |
|                                               | Moderately<br>limiting | 11<br>(0.8)   | 27<br>(2.0)   | 38<br>(2.8)   | 0.815<br>(0.130-5.112)  |               |
|                                               | Severely<br>limiting   | 2<br>(0.1)    | 4<br>(0.3)    | 6<br>(0.4)    | 1                       |               |

(a) Chi-square test  
\*statistically significant

**Table 3. Multivariate analysis.**

|                                 | <b>B</b> | <b>S.E.</b> | <b>Wald</b> | <b>df</b> | <b>Sig.</b> | <b>Exp(B)</b> | <b>95.0% CI. for EXP(B)</b> |              |
|---------------------------------|----------|-------------|-------------|-----------|-------------|---------------|-----------------------------|--------------|
|                                 |          |             |             |           |             |               | <b>Lower</b>                | <b>Upper</b> |
| <b>Chronic Pain</b>             | -1.718   | 0.872       | 3.884       | 1         | 0.049       | 0.179         | 0.032                       | 0.991        |
| <b>Chronic Pain<br/>Grade 0</b> |          |             | 10.125      | 3         | 0.018       |               |                             |              |
| <b>Chronic Pain<br/>Grade 2</b> | -1.170   | 0.890       | 1.728       | 1         | 0.189       | 0.310         | 0.054                       | 1.777        |
| <b>Chronic Pain<br/>Grade 3</b> | -0.792   | 0.881       | 0.810       | 1         | 0.368       | 0.453         | 0.081                       | 2.544        |
| <b>Chronic Pain<br/>Grade 4</b> | 0.065    | 0.943       | 0.005       | 1         | 0.945       | 1.067         | 0.168                       | 6.771        |
| <b>Constant</b>                 | 0.497    | 0.921       | 0.291       | 1         | 0.589       | 1.644         |                             |              |
